# Supplementary material
Source: PubMed Central journal article supplement (PMC5912654)
Supplement: NIHMS958073-supplement.pdf [file NIHMS958073-supplement.pdf]

## Supplementary Materials

### **Effect of dietary docosahexaenoic acid on rhodopsin content and packing in photoreceptor cell membranes**

Subhadip Senapati<sup>1</sup>, Megan Gragg<sup>1</sup>, Ivy S. Samuels<sup>2,3</sup>, Vipul M. Parmar<sup>1</sup>, Akiko Maeda<sup>1</sup>, and Paul S.-H. Park<sup>1,\*</sup>

<sup>1</sup>Department of Ophthalmology and Visual Sciences, Case Western Reserve University, Cleveland, OH 44106

<sup>2</sup>Research Service, Louis Stokes Cleveland Veterans Administration Medical Center, Cleveland, OH 44106

<sup>3</sup>Department of Ophthalmic Research, Cole Eye Institute, Cleveland Clinic, Cleveland, OH 44195

**Table S1. ANOVA and Tukey's post-hoc analysis of DHA quantification data in Table 1**

|                     | <i>p</i> -value |                    |                    |                    |                    |                    |                    |
|---------------------|-----------------|--------------------|--------------------|--------------------|--------------------|--------------------|--------------------|
|                     | ANOVA           | Control vs DHA-adq | Control vs DHA-def | Control vs DHA-rep | DHA-adq vs DHA-def | DHA-adq vs DHA-rep | DHA-def vs DHA-rep |
| DHA (µg/mg retina)  | <0.0001         | 0.0006             | < 0.0001           | 0.0666             | < 0.0001           | 0.0702             | <0.0001            |
| DHA (µg/mg protein) | < 0.0001        | 0.0019             | <0.0001            | 0.3856             | <0.0001            | 0.0333             | <0.0001            |

**Table S2. ANOVA and Tukey's post-hoc analysis of scotopic a-wave data in Fig. 1D**

| Flash intensity (log cd·s/m <sup>2</sup> ) | <i>p</i> -value |                    |                    |                    |                    |                    |                    |
|--------------------------------------------|-----------------|--------------------|--------------------|--------------------|--------------------|--------------------|--------------------|
|                                            | ANOVA           | Control vs DHA-adq | Control vs DHA-def | Control vs DHA-rep | DHA-adq vs DHA-def | DHA-adq vs DHA-rep | DHA-def vs DHA-rep |
| -0.6                                       | 0.0082          | 0.8264             | 0.0083             | 0.3105             | 0.0341             | 0.7533             | 0.2225             |
| 0                                          | 0.0003          | 0.7035             | 0.0004             | 0.1568             | 0.0022             | 0.6256             | 0.0288             |
| 0.6                                        | < 0.0001        | 0.8581             | < 0.0001           | 0.1777             | 0.0002             | 0.4881             | 0.0031             |
| 1.4                                        | 0.0050          | 0.8258             | 0.0343             | 0.8711             | 0.1383             | 0.3477             | 0.0042             |
| 2.1                                        | 0.0300          | 0.8905             | 0.1811             | 0.8029             | 0.4617             | 0.3483             | 0.0216             |

**Table S3. ANOVA and Tukey's post-hoc analysis of scotopic b-wave data in Fig. 1D**

| Flash intensity<br>(log cd·s/m <sup>2</sup> ) | <i>p</i> -value |                       |                       |                       |                           |                           |                           |
|-----------------------------------------------|-----------------|-----------------------|-----------------------|-----------------------|---------------------------|---------------------------|---------------------------|
|                                               | ANOVA           | Control vs<br>DHA-adq | Control vs<br>DHA-def | Control vs<br>DHA-rep | DHA-adq<br>vs DHA-<br>def | DHA-adq<br>vs DHA-<br>rep | DHA-def<br>vs DHA-<br>rep |
| -3.6                                          | 0.0201          | 0.4504                | 0.0269                | 0.9711                | 0.3525                    | 0.6677                    | 0.0461                    |
| -3.0                                          | 0.0347          | 0.6466                | 0.0519                | 0.9950                | 0.3462                    | 0.7520                    | 0.0602                    |
| -2.4                                          | 0.0140          | 0.7637                | 0.0818                | 0.8722                | 0.3617                    | 0.2914                    | 0.0113                    |
| -1.8                                          | 0.0002          | 0.7830                | 0.0024                | 0.7980                | 0.0110                    | 0.2404                    | 0.0002                    |
| -1.2                                          | < 0.0001        | 0.7446                | < 0.0001              | > 0.9999              | 0.0002                    | 0.6839                    | < 0.0001                  |
| -0.6                                          | < 0.0001        | 0.9116                | < 0.0001              | 0.9769                | < 0.0001                  | 0.9930                    | < 0.0001                  |
| 0                                             | < 0.0001        | 0.8265                | < 0.0001              | 0.8847                | < 0.0001                  | 0.9990                    | < 0.0001                  |
| 0.6                                           | < 0.0001        | 0.8244                | < 0.0001              | 0.6822                | 0.0001                    | 0.9924                    | 0.0002                    |
| 1.4                                           | 0.0001          | 0.6810                | 0.0005                | 0.9999                | 0.0031                    | 0.5968                    | 0.0002                    |
| 2.1                                           | 0.0004          | 0.7619                | 0.0018                | 0.9998                | 0.0091                    | 0.6832                    | 0.0008                    |

**Table S4. ANOVA and Tukey's post-hoc analysis of photopic b-wave data in Fig. 1E**

| Flash intensity<br>(log cd·s/m <sup>2</sup> ) | <i>p</i> -value |                       |                       |                       |                           |                           |                           |
|-----------------------------------------------|-----------------|-----------------------|-----------------------|-----------------------|---------------------------|---------------------------|---------------------------|
|                                               | ANOVA           | Control vs<br>DHA-adq | Control vs<br>DHA-def | Control vs<br>DHA-rep | DHA-adq<br>vs DHA-<br>def | DHA-adq<br>vs DHA-<br>rep | DHA-def<br>vs DHA-<br>rep |
| -1.0                                          | 0.2713          | 0.5989                | 0.2054                | 0.6389                | 0.8501                    | 0.9999                    | 0.8144                    |
| -0.4                                          | < 0.0001        | 0.9066                | < 0.0001              | 0.1027                | < 0.0001                  | 0.2618                    | < 0.0001                  |
| 0.2                                           | 0.0009          | 0.6372                | 0.0011                | 0.4922                | 0.0086                    | 0.9935                    | 0.0149                    |
| 0.8                                           | 0.0001          | 0.9710                | 0.0005                | 0.8865                | 0.0006                    | 0.9900                    | 0.0011                    |
| 1.4                                           | 0.0006          | 0.8586                | 0.0016                | 0.9620                | 0.0052                    | 0.9877                    | 0.0026                    |
| 2.0                                           | 0.0001          | 0.8943                | 0.0003                | 0.8343                | 0.0007                    | 0.9988                    | 0.0010                    |

**Table S5. ANOVA and Tukey's post-hoc analysis of ERG parameters in Table 2**

| ERG parameter                   | <i>p</i> -value |                    |                    |                    |                    |                    |                    |
|---------------------------------|-----------------|--------------------|--------------------|--------------------|--------------------|--------------------|--------------------|
|                                 | ANOVA           | Control vs DHA-adq | Control vs DHA-def | Control vs DHA-rep | DHA-adq vs DHA-def | DHA-adq vs DHA-rep | DHA-def vs DHA-rep |
| <i>S</i>                        | 0.0015          | 0.237              | 0.0008             | 0.1118             | 0.0371             | 0.9642             | 0.0891             |
| <i>Rm<sub>P3</sub></i>          | 0.2325          | 0.995              | 0.3949             | 0.9816             | 0.5308             | 0.927              | 0.2284             |
| <i>t<sub>d</sub></i>            | 0.0025          | 0.1156             | 0.0018             | 0.4987             | 0.1741             | 0.745              | 0.0274             |
| Scotopic <i>K</i>               | 0.1256          | 0.9738             | 0.2798             | 0.6616             | 0.1411             | 0.4222             | 0.9079             |
| Scotopic <i>R<sub>max</sub></i> | < 0.0001        | > 0.9999           | < 0.0001           | 0.1563             | < 0.0001           | 0.1643             | < 0.0001           |
| Scotopic <i>n</i>               | 0.0019          | 0.9602             | 0.0073             | 0.1966             | 0.0029             | 0.088              | 0.3384             |
| Photopic <i>K</i>               | 0.2908          | > 0.9999           | 0.3753             | 0.9992             | 0.3944             | 0.9997             | 0.4447             |
| Photopic <i>R<sub>max</sub></i> | 0.0222          | 0.9916             | 0.0291             | 0.8399             | 0.0500             | 0.9465             | 0.1344             |
| Photopic <i>n</i>               | 0.1371          | 0.4649             | 0.101              | 0.366              | 0.7786             | 0.9974             | 0.8758             |

**Table S6. ANOVA and Tukey's post-hoc analysis of c-wave data in Fig. 1F**

| ANOVA  | <i>p</i> -value    |                    |                    |                    |                    |                    |
|--------|--------------------|--------------------|--------------------|--------------------|--------------------|--------------------|
|        | Control vs DHA-adq | Control vs DHA-def | Control vs DHA-rep | DHA-adq vs DHA-def | DHA-adq vs DHA-rep | DHA-def vs DHA-rep |
| 0.0135 | 0.9654             | 0.0162             | 0.4413             | 0.0421             | 0.7097             | 0.3043             |

**Table S7. ANOVA and Tukey's post-hoc analysis of histological data in Figs. 2B and 2C**

| Histological parameter | <i>p</i> -value |                    |                    |                    |
|------------------------|-----------------|--------------------|--------------------|--------------------|
|                        | ANOVA           | Control vs DHA-adq | Control vs DHA-def | DHA-adq vs DHA-def |
| Number of nuclei       | 0.9465          | 0.9816             | 0.9414             | 0.9881             |
| ROS length             | < 0.0001        | 0.9221             | < 0.0001           | < 0.0001           |

**Table S8. T-test analysis of AFM data from ROS disc membranes prepared and analyzed by different users**

| ROS disc membrane property                | Set 1 <sup>a</sup><br>( <i>n</i> =80) | Set 2 <sup>b</sup><br>( <i>n</i> =95) | <i>p</i> -value |
|-------------------------------------------|---------------------------------------|---------------------------------------|-----------------|
| Disc diameter ( $\mu\text{m}$ )           | 1.23 $\pm$ 0.31                       | 1.26 $\pm$ 0.30                       | 0.4663          |
| Mean nanodomain size ( $\text{nm}^2$ )    | 1360 $\pm$ 389                        | 1281 $\pm$ 307                        | 0.1393          |
| Median nanodomain size ( $\text{nm}^2$ )  | 959 $\pm$ 278                         | 920 $\pm$ 195                         | 0.2788          |
| Number of nanodomains                     | 154 $\pm$ 98                          | 156 $\pm$ 103                         | 0.8918          |
| Number of rhodopsin                       | 14774 $\pm$ 10200                     | 14105 $\pm$ 9882                      | 0.6605          |
| Nanodomain density ( $\mu\text{m}^{-2}$ ) | 215 $\pm$ 67                          | 234 $\pm$ 65                          | 0.0566          |
| Rhodopsin density ( $\mu\text{m}^{-2}$ )  | 20053 $\pm$ 6188                      | 20661 $\pm$ 5381                      | 0.4875          |

<sup>a</sup> Data are those reported previously in Rakshit and Park (2015) *Biochemistry* 54, 2885-2894.

<sup>b</sup> Data are from the current study.

**Table S9. ANOVA and Tukey's post-hoc analysis of ROS disc membrane properties in Table 3**

| ROS disc membrane property | <i>p</i> -value |                    |                    |                    |                    |                    |                    |
|----------------------------|-----------------|--------------------|--------------------|--------------------|--------------------|--------------------|--------------------|
|                            | ANOVA           | Control vs DHA-adq | Control vs DHA-def | Control vs DHA-rep | DHA-adq vs DHA-def | DHA-adq vs DHA-rep | DHA-def vs DHA-rep |
| Disc diameter              | 0.7731          | 0.9982             | 0.9046             | 0.9123             | 0.8422             | 0.8581             | 0.9999             |
| Mean nanodomain size       | 0.6048          | 0.9987             | 0.6953             | 0.9661             | 0.6289             | 0.9353             | 0.9594             |
| Median nanodomain size     | 0.0506          | 0.0404             | 0.9451             | 0.8659             | 0.1228             | 0.3400             | 0.9909             |
| Number of nanodomains      | 0.0002          | 0.9994             | 0.0047             | 0.9831             | 0.0053             | 0.9670             | 0.0430             |
| Number of rhodopsin        | 0.0009          | 0.9993             | 0.0035             | 0.9733             | 0.0039             | 0.9521             | 0.0419             |
| Nanodomain density         | < 0.0001        | 0.8240             | < 0.0001           | 0.8895             | < 0.0001           | 0.4524             | < 0.0001           |
| Rhodopsin density          | < 0.0001        | 0.9075             | < 0.0001           | 0.6336             | < 0.0001           | 0.2955             | < 0.0001           |



**Table S10. ANOVA and Tukey's post-hoc analysis of 11-*cis* retinal quantification in Table 4**

| <i>p</i> -value |                    |                    |                    |
|-----------------|--------------------|--------------------|--------------------|
| ANOVA           | Control vs DHA-adq | Control vs DHA-def | DHA-adq vs DHA-def |
| 0.0809          | 0.9108             | 0.0778             | 0.2217             |

**Table S11. T-test analysis of ROS disc membrane properties of DHA-deficient and *Gnat*<sup>-/-</sup> mice**

| ROS disc membrane property                | DHA-deficient <sup>a</sup> (n=108) | <i>Gnat</i> <sup>-/-</sup> <sup>b</sup> (n=107) | <i>p</i> -value |
|-------------------------------------------|------------------------------------|-------------------------------------------------|-----------------|
| Disc diameter (μm)                        | 1.30 ± 0.39                        | 1.34 ± 0.45                                     | 0.4378          |
| Mean nanodomain size (nm <sup>2</sup> )   | 1331 ± 319                         | 1332 ± 292                                      | 0.9745          |
| Median nanodomain size (nm <sup>2</sup> ) | 903 ± 230                          | 804 ± 178                                       | 0.0005          |
| Number of nanodomains                     | 212 ± 150                          | 220 ± 141                                       | 0.6936          |
| Number of rhodopsin                       | 19619 ± 14205                      | 20968 ± 14327                                   | 0.4889          |
| Nanodomain density (μm <sup>-2</sup> )    | 313 ± 80                           | 308 ± 74                                        | 0.6404          |
| Rhodopsin density (μm <sup>-2</sup> )     | 28259 ± 4416                       | 28254 ± 5316                                    | 0.9939          |

<sup>a</sup> Data are from the current study.

<sup>b</sup> Data are those reported previously in Rakshit et al. (2017) *Biochim. Biophys. Acta* 1864, 1691-1702.
